# Supplementary material for: Dysregulation of core neurodevelopmental pathways—a common feature of cancers with perineural invasion
Source: Front Genet. 2023 Aug 31;14:1181775. doi: 10.3389/fgene.2023.1181775 (PMC10501147; doi:10.3389/fgene.2023.1181775)
Supplement: Supplementary file 2 [file Table3.XLSX]

## Sheet: Description
Supplementary Table 3: Data from Figure 2G - DEGs common in 3 or more datasets per cancer type for head and neck squamous cell carcinoma (HNSCC), pancreatic ductal adenocarcinoma (PDAC) and stomach adenocarcinoma (STAD) GEO datasets.
DEGs identified in more than 3 datasets for each cancer type examined were intersected amongst all cancer types examined.
The type of cancers with common genes are presented in column A, followed by the number of genes (column B) which are listed in column C with gene symbols. Each row in the first column shows a different combination of datasets.
Abbreviations: DEG, differentially expressed gene; HNSCC, head and neck squamous cell carcinoma; PDAC, pancreatic ductal adenocarcinoma; STAD, stomach adenocarcinoma

## Sheet: sheet 1
Supplementary Table 3: Data from Figure 2C - DEGs common in 3 or more datasets per cancer type for head and neck squamous cell carcinoma (HNSCC), Pancreatic ductal adenocarcinoma (PDAC ) and stomach adenocarcinoma (STAD) GEO datasets.
Cancer with common genes	Number of common genes	Gene symbols
STAD HNSCC PDAC	18	COL3A1
		PLAU
		IGF2BP3
		FAP
		INHBA
		COL1A1
		THBS2
		FN1
		SULF1
		COL5A2
		NOX4
		SPARC
		HPGD
		CDH11
		BGN
		COL1A2
		ECT2
		MMP11
HNSCC PDAC	43	XDH
		ADAM12
		PADI1
		CEACAM6
		MET
		PRSS2
		LOXL2
		NUCB2
		POSTN
		CYP2C18
		CEACAM5
		TSPAN8
		MICAL2
		DUOX2
		KRT17
		DLGAP5
		IFI27
		P4HA1
		LAMB3
		ANO1
		ADH1B
		LAMC2
		CXCL5
		DDX60
		SCNN1A
		STADNT3
		COL6A3
		NMU
		CEACAM1
		MELK
		COL11A1
		SCEL
		MALL
		TGFBI
		LAMA3
		AOX1
		MMP1
		SEMA3C
		EPHX2
		MMP12
		IFI44
		SLC2A1
		MMP9
STAD PDAC	16	CDH3
		TGM2
		LIFR
		SRPX2
		CEMIP
		CST1
		GPX8
		VCAN
		LEF1
		DPCR1
		PKM
		CTSK
		COL10A1
		CTHRC1
		FBXO32
		COL12A1
STAD HNSCC	22	MYO1B
		COL4A2
		SERPINH1
		LGALS1
		ALDH3A1
		CKAP2
		MYOC
		MAL
		PLA2G7
		MFAP2
		SNX10
		METTL7A
		SORBS2
		COL4A1
		ALDH6A1
		LOX
		ASPA
		THY1
		SPP1
		PMEPA1
		BUB1
		GPD1L
PDAC	246	PLPP4
		BTG2
		PRSS3P2
		CPA1
		PTPRR
		GSTA1
		LMO7
		CTNND2
		STYK1
		EPB41L4B
		MMP7
		S100P
		TMEM45B
		EDIL3
		SERPINB5
		PDIA2
		RGN
		FOXQ1
		EFNA5
		HEPH
		CCL18
		ASPM
		LRRN1
		PM20D1
		FAM129A
		PLEK2
		BACE1
		ITGA3
		INPP4B
		ANXA10
		TCN1
		ANXA3
		CTRC
		IAPP
		HOMER2
		REG1CP
		PLA2G1B
		ANLN
		DGKH
		FAM150B
		MMP14
		PLAT
		ITGB4
		DCBLD2
		NQO1
		ADAM28
		ANXA8L1
		IL1R2
		MUC16
		KRT6C
		CELA3B
		TRIM31
		IFI44L
		ADGRF1
		FNDC1
		ERP27
		MCOLN3
		PCDH7
		KIAA1324
		SLC6A6
		TRIM29
		TMC5
		GNMT
		SLC43A1
		PXDN
		CTSE
		OAS2
		EPYC
		HK2
		CELP
		MUC17
		CELA2B
		GABRP
		TOP2A
		EDNRA
		NR5A2
		GJB2
		GALNT5
		ERO1A
		EFNB2
		COMP
		ABAT
		RAI14
		TNS4
		CELA3A
		LTBP1
		AEBP1
		SYTL2
		AQP12B
		FCGR3B
		NRP2
		CORIN
		ACADL
		IL22RA1
		MFAP5
		BCAS1
		SULT1C2
		PKHD1
		EPHA4
		BEX1
		PLA2R1
		CEL
		ANTXR2
		ANPEP
		LIPH
		SLC39A5
		CFTR
		NRG4
		REG1A
		DSG3
		RUNX2
		DKK1
		KRT7
		PGM2L1
		PAIP2B
		RHBDL2
		F11
		ARNTL2
		COL17A1
		MT1G
		TSPAN1
		CPA2
		KRT19
		ASAP2
		TNFAIP6
		LMO3
		BNIP3
		ERO1B
		G6PC2
		OAS1
		MYOF
		GUCA1C
		FGL1
		TTN
		C2CD4B
		ITGA11
		C5
		EGF
		VSIG1
		PLS1
		FAM3B
		FERMT1
		AQP8
		SLC1A2
		ANKRD22
		CTRL
		REG1B
		S100A14
		LYZ
		SYCN
		NRCAM
		OSBPL3
		TMPRSS4
		ANTXR1
		KYNU
		SCGN
		CAPG
		CCL20
		SDR16C5
		ADAM9
		MATN3
		EGLN3
		CDCP1
		ENO2
		PNLIPRP1
		OLR1
		NPR3
		KLK1
		SLPI
		GPRC5A
		PAK3
		CLPS
		MUC13
		CHRM3
		NT5E
		SULF2
		CST2
		SLC17A4
		TMED6
		SST
		LCN2
		ACTA2
		PLAC8
		ALB
		MXRA5
		IL1RAP
		GPX2
		TRHDE
		ACSL5
		PRSS3
		APOL1
		AHNAK2
		SERPINB3
		AREG
		ITGA2
		GREM1
		TFPI2
		KCNJ16
		ETV1
		SERPINI2
		GRB14
		MLPH
		REG3G
		S100A16
		FBN1
		DCDC2
		TFF1
		IGFL2
		GP2
		KCNN4
		GATM
		SLC4A4
		SLC6A14
		CLDN18
		FGD6
		DPP10
		F8
		ABHD17C
		KRT6A
		CP
		GPHA2
		MTMR11
		FXYD3
		PDK4
		UGT1A3
		CELA2A
		MBOAT2
		IGFBP5
		COL8A1
		RBPJL
		DPYSL3
		ADAMTS6
		CENPF
		C6
		SLC16A10
		CD109
		SLC22A3
		DHRS9
		ADAMTS12
		AGR2
		PNLIPRP2
		ST6GALNAC1
		LAMP5
		SLC7A2
		BAIAP2L1
		SLC44A4
HNSCC	231	PTN
		TGM1
		PDPN
		BLNK
		TK1
		BID
		ZSCAN18
		DPT
		ARHGAP32
		MFAP4
		CILP
		MMP13
		ALOX12
		SHCBP1
		EXT1
		HMGB3
		UPK1A
		TNC
		HOMER3
		IGF2BP2
		MMP3
		CENPE
		MGLL
		SASH1
		PARP12
		CD24
		CXCL13
		OGN
		ENDOU
		CLCA4
		BST2
		SERPINE2
		IFI6
		CRYM
		ABCG1
		ATAD2
		CLIC4
		CLIC3
		SLC16A6
		KRT4
		BIRC5
		EPHX3
		CES2
		ACKR1
		SORBS1
		ETFDH
		SLC16A7
		P3H1
		KLK13
		KRT13
		UBE2C
		RMND5B
		EXOSC7
		FSCN1
		EXPH5
		C2orf54
		AQP3
		FADD
		FOXA1
		ERBB3
		SERPINB1
		CDK1
		GDPD3
		FUT3
		IFIT1
		LAMP3
		CRYAB
		LOC101927705
		PTHLH
		IL24
		CLU
		DUSP5
		IL36A
		TF
		PAX9
		DCLK1
		MGST2
		FEZ1
		APOD
		RECK
		CXCL9
		SNAPC1
		MYO5C
		TAP1
		CFH
		FUT6
		PRSS23
		AIM1L
		COL7A1
		DSG2
		NID2
		MYH7
		RAPGEFL1
		CRNN
		NEBL
		KIF18A
		UBE2L6
		HLF
		ATP2C1
		CEACAM7
		AURKA
		CXCL8
		COL16A1
		ECM1
		CLDN7
		KIF14
		NDNF
		ITM2A
		FHL1
		LRP12
		RAB11FIP1
		COX7A1
		IL1RN
		PLAGL1
		TGM5
		ANXA9
		SPINK5
		KLF4
		RAD51AP1
		EMP1
		COL4A6
		PFN2
		ATP2A1
		IFI35
		TM7SF2
		CXCL10
		FMO2
		PPL
		ZNF185
		ABCA8
		SERPINE1
		HERC5
		MKI67
		EPS8L1
		SERPINB2
		CYP3A5
		PITX1
		EPS8L2
		RSAD2
		ZFP36
		NDRG2
		PLPP3
		ADH7
		COBL
		TGFBR3
		BLM
		ANK2
		SCRN1
		HMMR
		FCER1A
		KIF4A
		ITGAV
		FAT1
		PTK7
		NREP
		DDX58
		ECHDC2
		FAM107A
		MYH11
		IFIH1
		CDH19
		DUSP1
		GPX3
		PPP1R3C
		MYO5A
		RRAGD
		SLURP1
		GALNT2
		AIM2
		FOSB
		TGM3
		GALNT12
		ITGA6
		STC2
		TDO2
		SHOX2
		GMDS
		IGFBP3
		COL5A1
		AGFG2
		SCNN1B
		PTK6
		PRELP
		HOXC6
		LPIN1
		KLK12
		CDC20
		LONRF1
		BSPRY
		ACPP
		NDC80
		KLK11
		PSCA
		RHCG
		HOXB7
		TTC9
		SULT2B1
		RBP1
		MMP10
		TTK
		SNAI2
		PLOD2
		CYP2J2
		NCAPG
		LPCAT1
		AMIGO2
		ATP10B
		SELENBP1
		EVPL
		SLC16A1
		CRISP3
		STAT1
		DFNA5
		GULP1
		CFD
		RNASE4
		TMPRSS2
		NEK2
		KAT2B
		CYP4B1
		ABLIM1
		STK39
		TMEM100
		ISG15
		EYA2
		DUOX1
		HOPX
		ATP6V0A4
		CTSC
		PLOD1
		ADIPOQ
STAD	134	CD44
		NR3C2
		CNTN3
		ENG
		C1R
		FCGR2A
		ATP11B
		TMEM158
		XK
		FAM19A5
		CAPN13
		SERPINF1
		ELOVL5
		GPNMB
		TNFSF4
		EPN3
		UBL3
		TREM2
		DHRS7
		CD79A
		COL15A1
		APOE
		HOXC9
		GSTA4
		ATP4A
		PDLIM4
		RASAL1
		TUBB6
		LRP8
		FZD2
		LINC01105
		P4HA3
		CD36
		COL18A1
		HRASLS2
		IFI30
		C16orf89
		GIF
		HMCN1
		BAG2
		BMP1
		LINC01094
		PRR5L
		CTSL
		ATP4B
		KDELC1
		CHI3L1
		CHGA
		TMEM116
		CMTM3
		CAPN9
		SMIM14
		HTRA1
		WISP1
		PKIB
		ESRRG
		TREH
		AKR7A3
		PBLD
		SPON2
		PXMP2
		OLFML2B
		S100A10
		SALL4
		GUCY1B3
		RPS6KA6
		ENO1
		CKS1B
		RNASE1
		MYZAP
		MIA2
		STAD
		DTL
		RAB27B
		CTSB
		MYL9
		CPVL
		PDGFD
		B3GNT6
		AKR1C1
		MEST
		IL32
		FKBP10
		LY6E
		TPM2
		SCUBE2
		LZTS1
		KCNE2
		SOSTDC1
		AJUBA
		C1orf115
		UPP1
		TPCN2
		SPHK1
		EPHB6
		DLC1
		RGMA
		SECTM1
		RAB27A
		CLDN1
		PPID
		NSG1
		SGK2
		FCER1G
		TIE1
		STADNT2
		AKR1C3
		SFRP4
		CKMT2
		ACTN1
		LINC-PINT
		CCKBR
		ANG
		ADRB2
		CHN1
		CWH43
		CEBPB
		TM6SF2
		TIMP1
		RAB31
		FJX1
		HDC
		HEYL
		OASL
		TRIM36
		NNMT
		SLC7A8
		APOC1
		GPAT3
		ATP2A3
		TEAD4
		ANGPT2
		FAM174B
		ESM1
